# Supplementary material for: Green synthesis of nitrogen and sulphur-doped carbon quantum dots for dual sensing of brilliant green dye and Cu2+ ions in environmental samples
Source: Royal Society of Chemistry journal article supplement (doi:10.1039/d4nj01104j), 2024-01-01
Supplement: d4nj01104j1.pdf [file d4nj01104j1.pdf]

## SUPPORTING INFORMATION

### Green Synthesis of Nitrogen and Sulfur Co-doped Carbon Quantum Dots for Dual Sensing Brilliant green dye and $\text{Cu}^{2+}$ ions in environmental samples

#### CONTENTS

##### Supplementary Figures S1-S2

**Fig. S1. EDX analysis of N,S-CQDs and CQDs**

**Fig. S2. The quantum yield of the synthesized N,S-CQDs**

**Fig. S3. The fluorescence excitation and emission spectra of BG dye**

##### Supplementary Table S1

**Table S1. Details of fluorescence lifetime measurement with different concentration of  $\text{Cu}^{2+}$  ions and BG dye.**

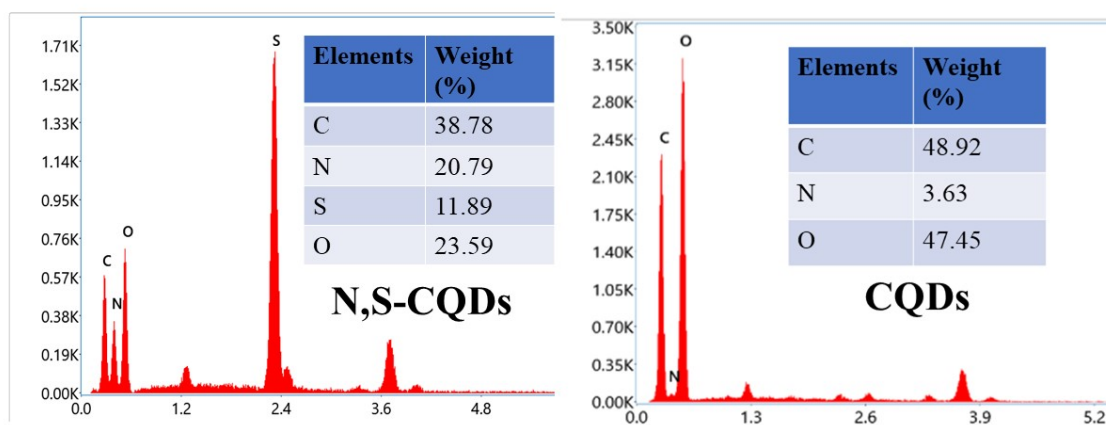

**Fig. S1. EDX analysis of N,S-CQDs and CQDs.**

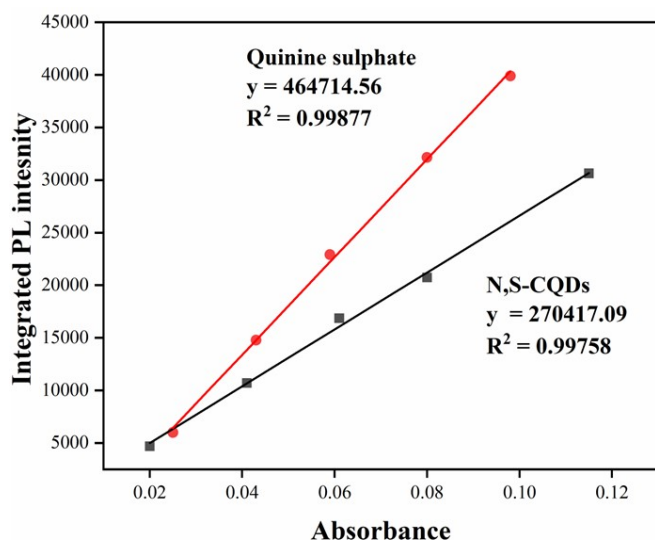

**Fig. S2.** The quantum yield of the synthesized N,S-CQDs

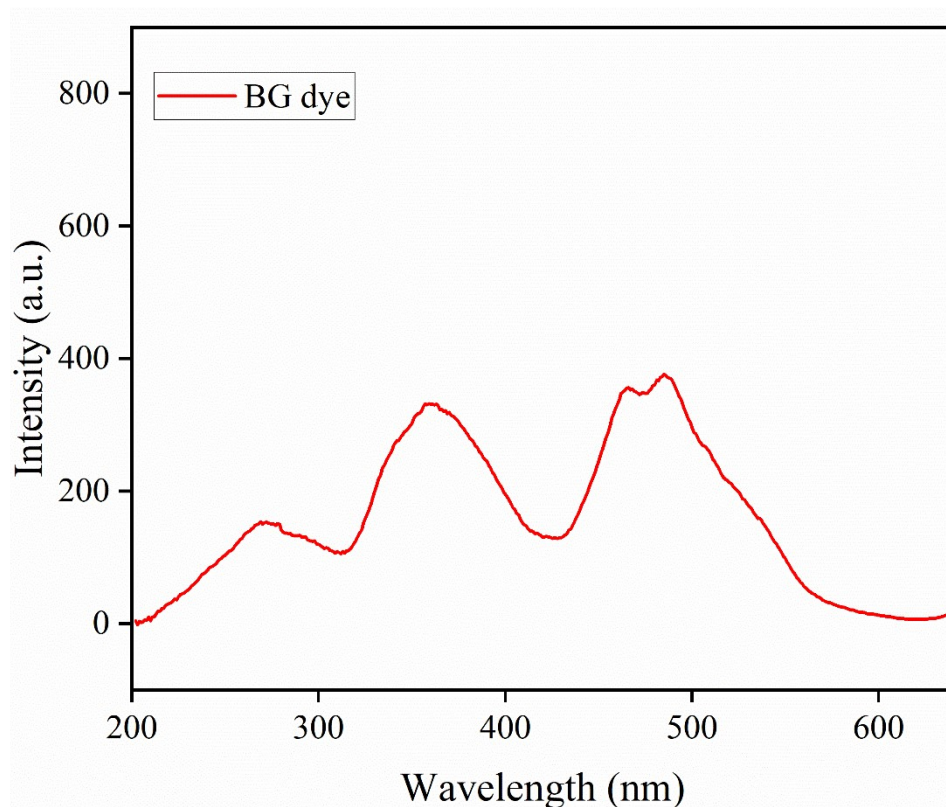

**Fig. S3.** The fluorescence excitation and emission spectra of BG dye

The fluorescence excitation and emission spectra of BG dye reveal two peaks. The first peak, at 358 nm, is linked to electronic transitions within the molecule, potentially involving lower energy levels. This could signify  $n-\pi^*$  transitions, where an electron shifts from a non-bonding orbital ( $n$ ) to an antibonding  $\pi^*$  orbital. The second peak, at 471 nm, corresponds to longer-wavelength emission and is also associated with electronic transitions involving lower

energy levels within the molecule, possibly through n- $\pi^*$  transitions from a non-bonding orbital (n) to an antibonding  $\pi^*$  orbital.

**Table S1.** Details of fluorescence lifetime measurement with different concentration of  $\text{Cu}^{2+}$  ions and BG dye.

|                            | $A_1$<br>(ns) | $A_2$<br>(ns) | $T_1$<br>(ns) | $T_2$<br>(ns) | $T_{\text{avg}}$<br>(ns) |
|----------------------------|---------------|---------------|---------------|---------------|--------------------------|
| N,S-CQD                    | 40.961        | 14.27         | 5.37          | 1.26          | 5.07                     |
| N,S-CQD + $\text{Cu}^{2+}$ | 41.672        | 15.48         | 6.42          | 1.34          | 6.05                     |
| N,S-CQD + BG dye           | 38.072        | 13.28         | 5.11          | 1.27          | 4.8                      |

Fitted the double exponential function  $y(t)$  to get the lifetime decay curve, and calculate the average life accordingly.

$$y(t) = A_1 e^{-t/T_1} + A_2 e^{-t/T_2}$$

$$T_{\text{avg}} = (A_1(T_1)^2 + A_2(T_2)^2)/(A_1 T_1 + A_2 T_2)$$
